# Supplementary material
Source: PubMed Central journal article supplement (PMC3268324)
Supplement: 1118834109_pnas.201118834SI.pdf [file 1118834109_pnas.201118834SI.pdf]

# Supporting Information

Lang et al. 10.1073/pnas.1118834109

## SI Materials and Methods

**Quantitative RT-PCR Measurement.** RT-PCR analysis was performed as previously described (1). Briefly, mRNA was extracted from livers stored in 1 mL of TRIzol (Invitrogen) according to the manufacturer's instructions. After homogenization with a tissue lyser (Qiagen), 200  $\mu$ L of chloroform was added, and samples were vortexed for at least 15 s. Then samples were centrifuged at  $14,480 \times g$  at 4 °C for 10 min, then supernatant was transferred into a new tube, and RNA was precipitated with 2-isopropanol for 20 min at room temperature. After washing with 75% ethanol, pellets were air-dried and resuspended in DEPC-treated water (Ambion). Gene expression of GAPDH, Irf7, and Usp18 was performed with kits from Applied Biosystems. For analysis, the expression levels of all target genes were normalized to GAPDH expression ( $\Delta$ Ct). Gene expression values were then calculated based on the  $\Delta\Delta$ Ct method, using the mean of three naive mice as a standard to which all other samples were compared. Relative quantities (RQ) were determined by using the equation  $RQ = 2^{-\Delta\Delta Ct}$ .

**Gradient Centrifugation.** Detailed gradient centrifugation procedures (2) were as follows. 100% Percoll (Percoll) was 9 $\times$  Percoll reagent (GE Healthcare) and 10 $\times$  PBS. Livers were homogenized, centrifuged ( $421 \times g$  for 5 min), and resuspended in 40% Percoll (4 $\times$  Percoll + 6 $\times$  RPMI medium 1640) in 50-mL Falcon tubes. Slowly, 70% Percoll (7 $\times$  Percoll + 3 $\times$  RPMI medium 1640) was underlaid with a Pasteur pipette (VWR). After centrifugation at  $859 \times g$  for 20 min without brake, the interface was harvested carefully. After one wash with HBSS, the lymphocyte population was resuspended in PBS containing 5 mM EDTA and 1% FCS.

**T-Cell Proliferation.** First, 96-well plates were coated overnight with anti-CD3 (3  $\mu$ g/mL; BD Pharmingen) antibody at 4 °C. Negatively sorted T cells were labeled with 2.5  $\mu$ M 5,6-carboxy-fluorescein diacetate succinimidyl ester (CFSE) in PBS for 10 min at 37 °C. After two washes (Iscove's modified Dulbecco's media/10% FCS), cells were resuspended in Iscove's modified Dulbecco's media/10% FCS containing 2  $\mu$ g/mL anti-CD28 an-

tibody at a frequency of  $2 \times 10^6$  per mL. Then,  $2 \times 10^5$  T cells were coincubated with  $10^5$  purified NK cells on the precoated plate. IFN- $\alpha$ 4 (PBL) was added before coincubation at an activity of  $10^4$  U/mL. After 72 h, the number of CD8 $^+$  and CD4 $^+$  T cells was analyzed.

**Flow Cytometry (FCM) Analysis.** Tetramer was provided by the National Institutes of Health Tetramer Core Facility at Emory University. Tetramer, surface, and intracellular FCM staining were performed as described previously (1). Briefly, single suspended splenocytes or liver or peripheral blood lymphocytes were stained with allophycocyanin-labeled gp33 MHC I tetramers (gp33/H-2D $^b$ ) for 15 min at 37 °C, followed by staining with anti-CD8-PerCP (BD Biosciences) for 30 min at 4 °C. For determination of their activation status, lymphocytes were stained with anti-PD-1 and anti-IL-7R $\alpha$  (both BD Pharmingen) for 30 min at 4 °C. For intracellular cytokine staining, single suspended splenocytes or liver cells were incubated with the lymphocytic choriomeningitis virus (LCMV)-specific peptides gp33 and np396. After 1 h, brefeldin A (eBioscience) was added, followed by additional 5-h incubation at 37 °C. After surface staining of CD8 (eBioscience), cells were fixed with 2% formalin and permeabilized with PBS containing 1% FCS and 0.1% saponin and stained with anti-IFN- $\gamma$  (eBioscience) for 30 min at 4 °C. Anti-NK1.1, anti-CD4, anti-CD3e, anti-2B4, anti-NKG2D, anti-Thy1.1, and anti-CD45.1 antibodies were from eBioscience. NKG2D-human IgG (hIgG) was used to indicate NKG2D ligand expression (3) on T cells and was stained with anti-hIgG Cy3 (Dianova).

**NK Cell Cytotoxicity Assay.** A total of  $2 \times 10^6$  splenocytes from LCMV-infected (2 d after infection) and naive mice were incubated for 5 h at 37 °C in 96-well plates with YAC-1 target cells that had been previously loaded with 400  $\mu$ Ci/mL  $^{51}$ Cr (Perkin-Elmer). Then, 50  $\mu$ L of the culture supernatant was counted from each well by using a Wallac Wizard counter (Perkin-Elmer). Maximal release was induced by adding 100  $\mu$ L of 1 M HCl to target cells. Specific lysis (given in percentage) was calculated as follows:  $(\text{cpm sample release} - \text{cpm spontaneous release}) / (\text{cpm maximal release} - \text{cpm spontaneous release}) \times 100$ .

1. Lang PA, et al. (2009) Hematopoietic cell-derived interferon controls viral replication and virus-induced disease. *Blood* 113:1045–1052.  
2. Lang PA, et al. (2010) Tissue macrophages suppress viral replication and prevent severe immunopathology in an interferon-I-dependent manner in mice. *Hepatology* 52(1): 25–32.

3. Cerwenka A, et al. (2000) Retinoic acid early inducible genes define a ligand family for the activating NKG2D receptor in mice. *Immunity* 12:721–727.
